# Supplementary material for: Graphene Oxide/Polyethylene Glycol-Stick for Thin Film Microextraction of β-Blockers from Human Oral Fluid by Liquid Chromatography-Tandem Mass Spectrometry
Source: MDPI journal article supplement (doi:10.3390/molecules24203664), 2019-10-11
Supplement: s1 [file s1]

## Supplementary Material

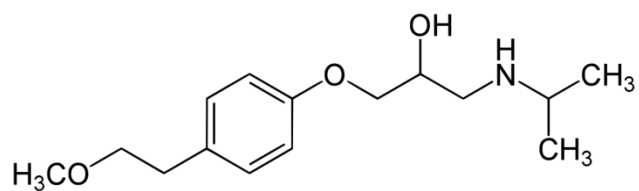

Metoprolol

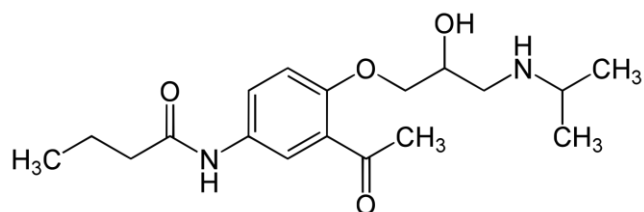

Acebutolol

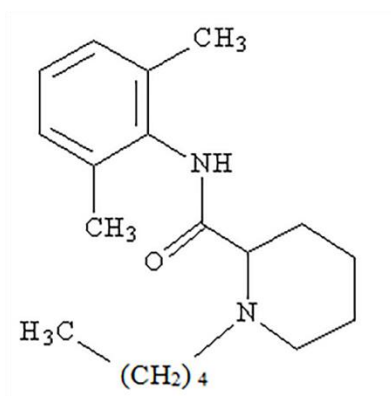

Pentycaine (I.S)

**Figure S1.** Chemical structures of  $\beta$ -blockers and internal standard

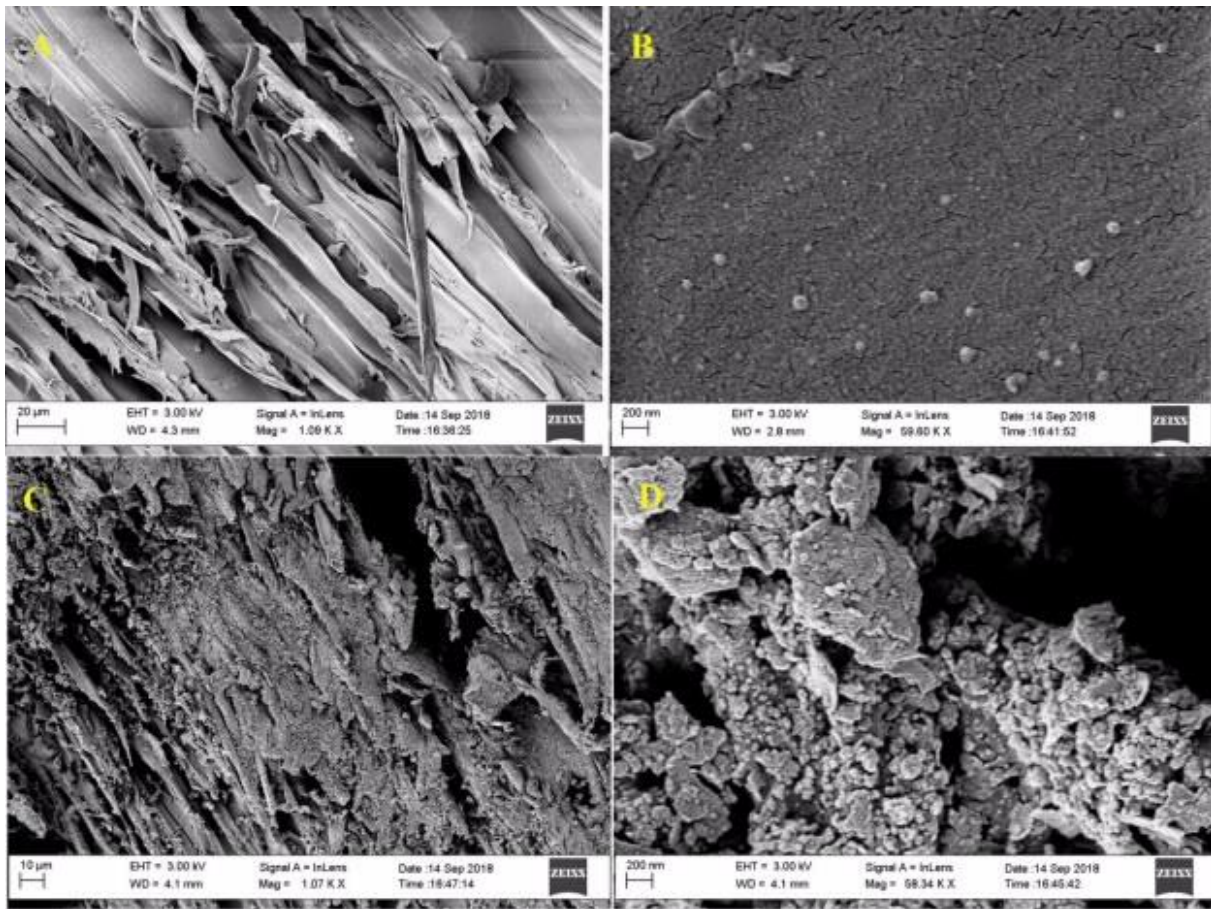

**Figure S2.** SEM image of cellulose stick (A,B) and GO/PEG-stick (C,D).
